# Supplementary material for: Light induced catalytic hydrodefluorination of perfluoroarenes by porphyrin rhodium
Source: Royal Society of Chemistry journal article supplement (doi:10.1039/c5qi00269a), 2016-01-01
Supplement: c5qi00269a1.pdf [file c5qi00269a1.pdf]

# Light induced catalytic hydrodefluorination of perfluoroarenes by porphyrin rhodium

Xu Liu, Zikuan Wang, Xianyuan Zhao and Xuefeng Fu \*

*Beijing National Laboratory for Molecular Sciences, State Key Lab of Rare Earth Materials*

*Chemistry and Applications, Peking University, Beijing, 100871, China. Fax: +86 10 6275 1708; Tel:*

*+86 10 6275 6035; E-mail: [fuxf@pku.edu.cn](mailto:fuxf@pku.edu.cn)*

## Contents

1. General Considerations
2. Preparation of  $\text{Na}_4[(\text{TSPP})\text{Rh}^{\text{III}}(\text{D}_2\text{O})_2]$
3. Spectra for Mechanistic Studies
4. Effects of Silanes
5. General Procedure for Catalytic Hydrodefluorination Catalyzed by Porphyrin Rhodium
6. Spectral Data for Selected Compounds

## 1. General Considerations

$\text{D}_2\text{O}$  and  $\text{CD}_3\text{OD}$  were purchased from Cambridge Isotope Laboratory Inc.; tetra (*p*-sulfonatophenyl) porphyrin from Tokyo Chemical Industry (TCI);  $(\text{Rh}(\text{CO})_2\text{Cl})_2$  from Strem Chemical Inc.; and all other chemicals were purchased from Alfa Aesar or J&K Scientific Ltd. unless otherwise noted and used as received.  $^1\text{H}$  NMR spectra were recorded on a Bruker AVII-400 spectrometer at ambient temperature.  $^1\text{F}$  NMR spectra were recorded on a Bruker AVII-300 spectrometer and a Bruker AVII-400 spectrometer at ambient temperature. GC-MS results were obtained by the Agilent 7980A/5975C GC/MSD system equipped with the DB-17MS (30m, 0.25mm, 0.25  $\mu\text{m}$ ) column. GC results were obtained by the Agilent 7980A system equipped with the DB-5MS UI (30 m, 0.25 mm, 0.50  $\mu\text{m}$ ) column. ESI-MS results were obtained by a Bruker Apex IV FTMS. Light irradiation experiments was performed using a 500W high-pressure mercury lamp (CHF-XM35-500W, Beijing Trusttech Co., Ltd.,) and the glass vessel was positioned about 15.0 cm away from the light source.

## 2. Preparation of $\text{Na}_4[(\text{TSPP})\text{Rh}^{\text{III}}(\text{H}_2\text{O})_2]$

$\text{Na}_3[(\text{TSPP})\text{Rh}^{\text{III}}(\text{H}_2\text{O})_2]$  was synthesized by following literature methods of Ashley.<sup>1</sup> The equilibrium distribution of  $[(\text{TSPP})\text{Rh}^{\text{III}}(\text{D}_2\text{O})_2]^{-3}$ ,  $[(\text{TSPP})\text{Rh}^{\text{III}}(\text{D}_2\text{O})(\text{OD})]^{-4}$  and  $[(\text{TSPP})\text{Rh}^{\text{III}}(\text{OD})_2]^{-5}$

were reported in the previously published paper.<sup>2</sup> <sup>1</sup>HNMR (D<sub>2</sub>O, 400 MHz)  $\delta$ (ppm): 9.15 (s, 8H, pyrrole), 8.44 (d, 8H, *o*-phenyl,  $J_{\text{H-H}}=8$  Hz), 8.25 (d, *m*-phenyl,  $J_{\text{H-H}}=8$  Hz). The stock solution of (TSPP)Rh<sup>III</sup> was prepared in H<sub>2</sub>O.

### 3. Spectra for Mechanistic Studies

#### 3.1 Synthesis of (TSPP)Rh<sup>I</sup>

(TSPP)Rh<sup>I</sup> was synthesized following our previous reported method<sup>3</sup>. 10  $\mu$ L of triethylamine was added to 2 mL aqueous solution of (TSPP)Rh<sup>III</sup> (1.0 mM) in 10 mL Schlenk flask. After being degassed by three freeze-pump-thaw cycles, the mixture was stirred at 50 °C for 2 hours, yielding (TSPP)Rh<sup>I</sup> quantitatively. The water, excessive triethylamine and other volatile by-products were removed under vacuum line. Then the (TSPP)Rh<sup>I</sup> was dissolved in 0.8 mL methanol solution of 12.0 mM sodium borate buffer which was used for stoichiometric and catalytic reactions with the concentration of (TSPP)Rh<sup>I</sup> 2.5 mM.

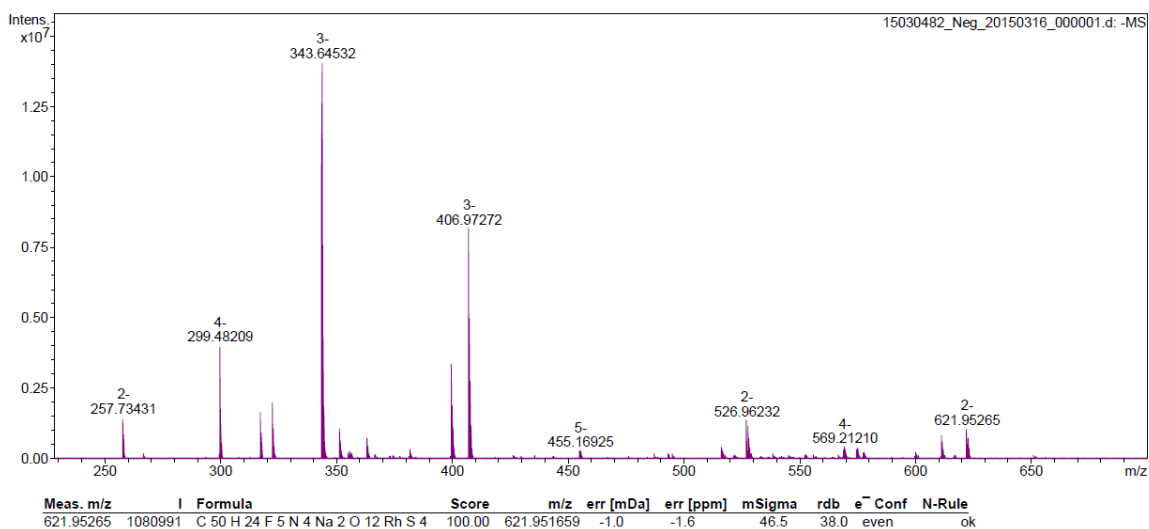

(ESI-MS : 1243.91 and Exact Mass: 1243.91)

**Figure 1S** ESI-MS of anion [(TSPP)Rh-C<sub>6</sub>F<sub>5</sub>]Na<sub>2</sub><sup>2-</sup>

(TSPP)Rh-C<sub>6</sub>F<sub>5</sub>: <sup>1</sup>HNMR (CD<sub>3</sub>OD, 400 MHz)  $\delta$  (ppm): 8.77 (s, 8H, pyrrole), 8.22 (d, 8H, *o*-phenyl,  $J_{\text{H-H}}=8$  Hz), 8.17 (d, *m*-phenyl,  $J_{\text{H-H}}=8$  Hz).

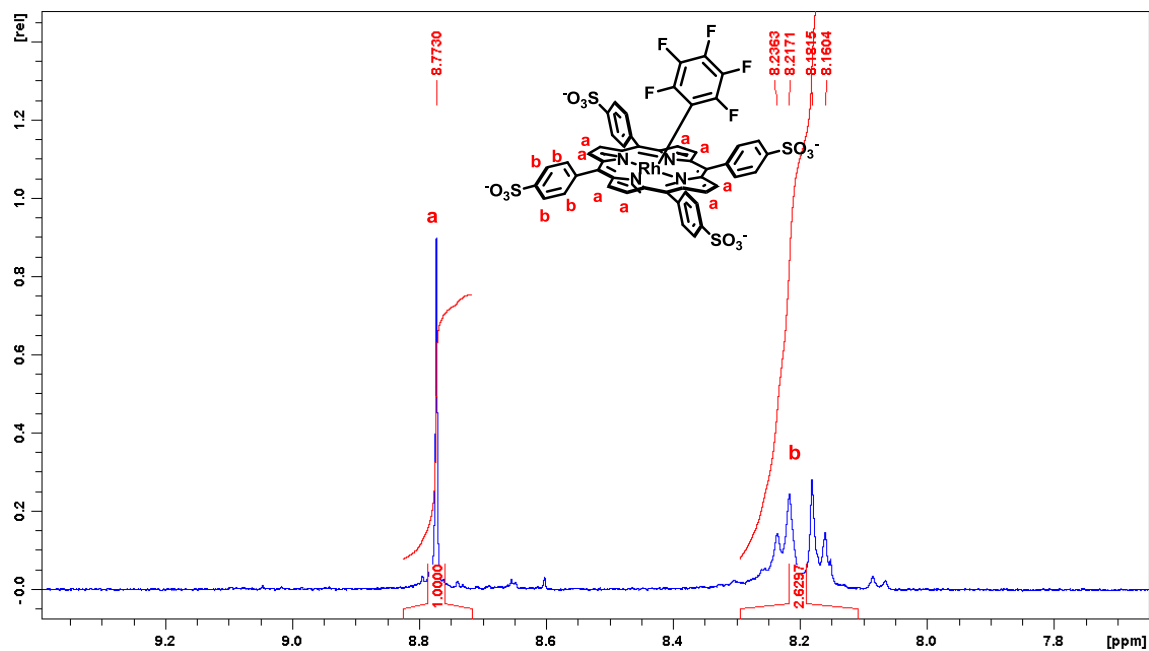

Figure 2S <sup>1</sup>H NMR of (TSPF)Rh-C<sub>6</sub>F<sub>5</sub> in CD<sub>3</sub>OD

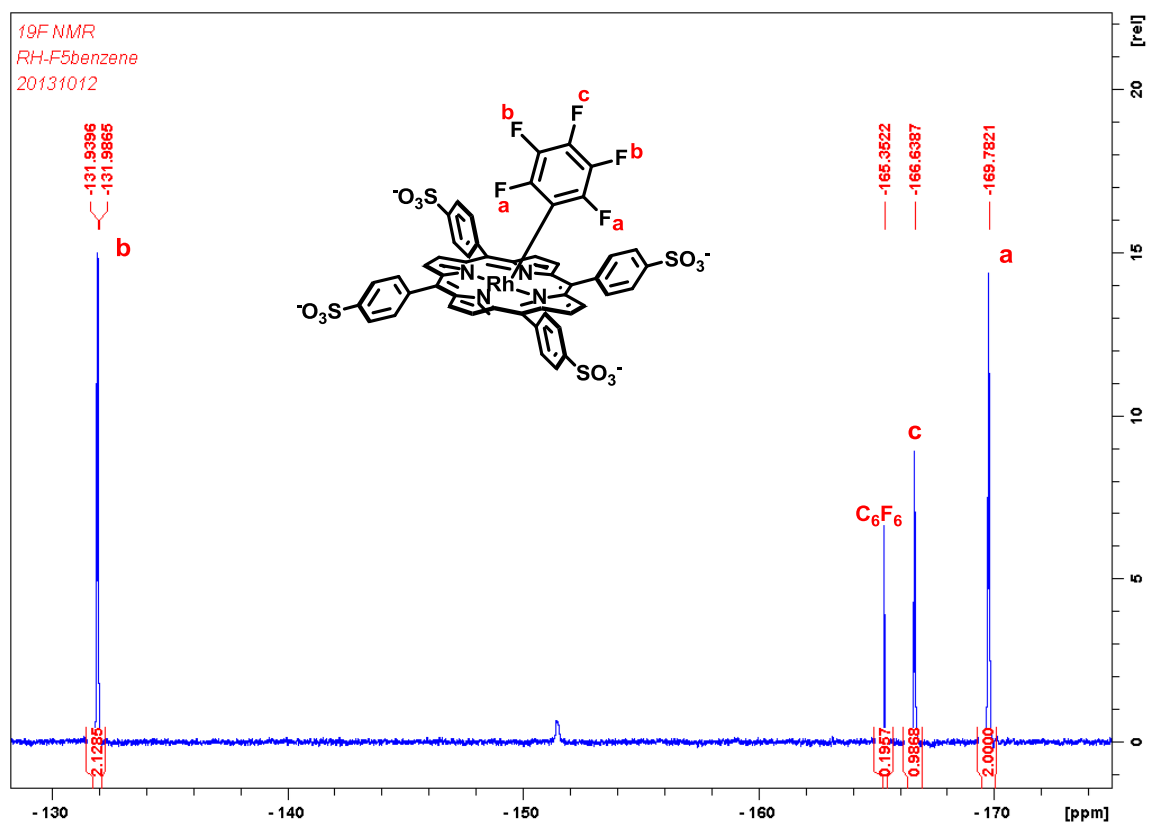

Figure 3S <sup>19</sup>F NMR of (TSPF)Rh-C<sub>6</sub>F<sub>5</sub> in CD<sub>3</sub>OD

The  $\text{C}_6\text{F}_5$  radical, which is the photo-cleavage product of Rh-C bond, was trapped by TEMPO (TEMPO=2,2,6,6-Tetramethylpiperidine-1-oxyl) (Figure 4S)

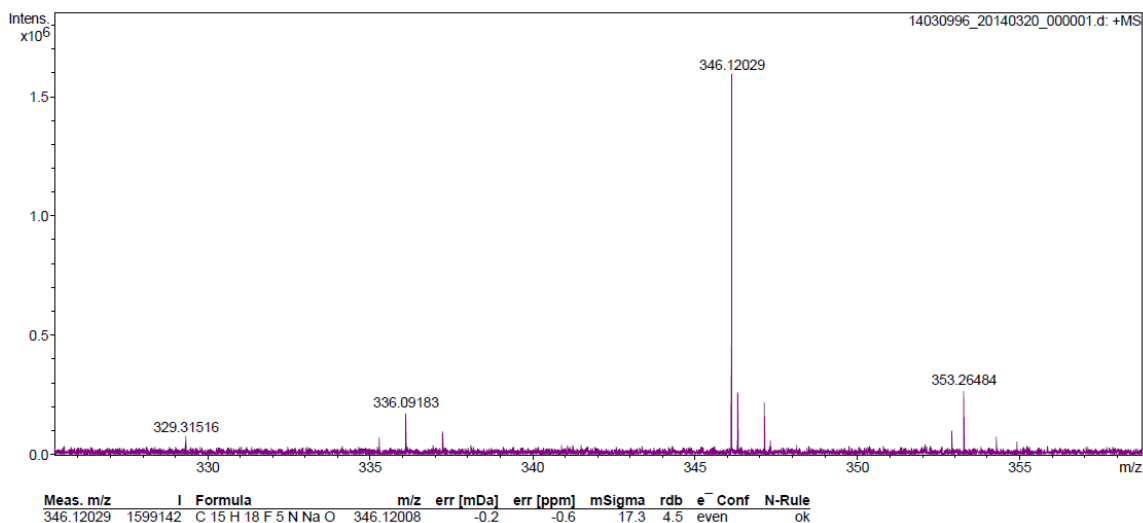

**Figure 4S ESI-MS of TEMPO- $\text{C}_6\text{F}_5$**   
(ESI-MS: 346.120 and Exact Mass: 346.120)

The generation of  $(\text{TSPP})\text{Rh}^{\text{I}}$  upon treatment of  $(\text{TSPP})\text{Rh}^{\text{III}}$  with  $\text{Me}_2\text{EtSiH}$  was confirmed by trapping with  $\text{CH}_3\text{I}$ , yielding the known  $(\text{TSPP})\text{Rh}^{\text{III}}\text{-CH}_3$  complex.

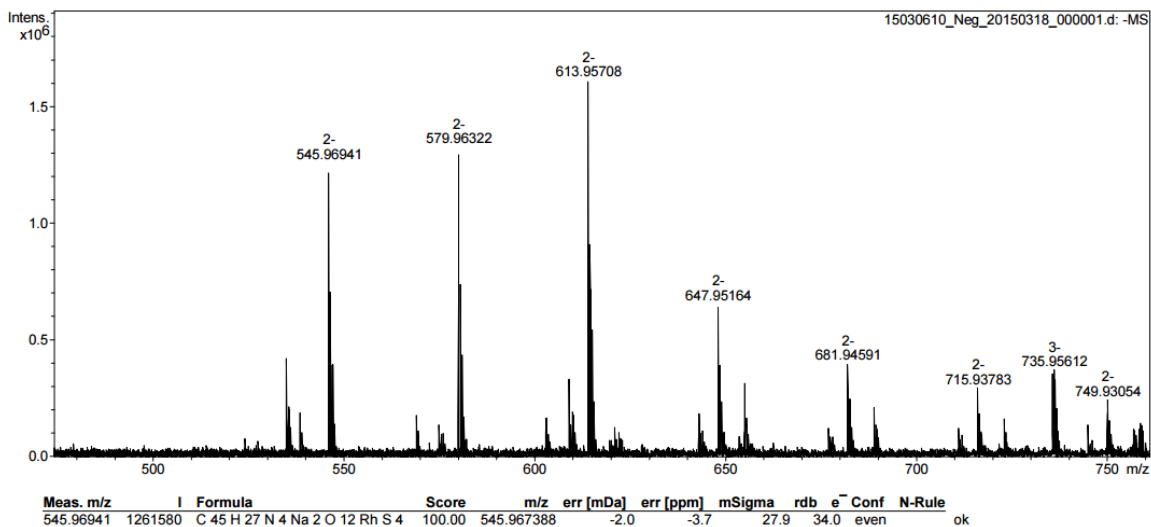

**Figure 5S ESI-MS of  $(\text{TSPP})\text{Rh-CH}_3$**   
(ESI-MS: 1091.94 and Exact Mass: 1091.94)

#### 4. Effects of Silanes

**Table 1S** Effects of silanes<sup>a</sup>

| entry          | NEt <sub>3</sub> | R <sub>3</sub> SiH                                   | turnover <sup>b</sup> |
|----------------|------------------|------------------------------------------------------|-----------------------|
| 1              | no               | 0.2 mmol Me <sub>2</sub> PhSiH                       | 13.5                  |
| 2              | no               | 0.2 mmol Et <sub>3</sub> SiH                         | 21.3                  |
| 3              | no               | 0.2 mmol Ph <sub>2</sub> MeSiH                       | 15.5                  |
| 4              | no               | 0.2 mmol (EtO) <sub>2</sub> MeSiH                    | 15.5                  |
| 5              | no               | 0.2 mmol Et <sub>2</sub> MeSiH                       | 30.5                  |
| 6 <sup>c</sup> | no               | ethylene glycol 30 uL 0.2 mmol EtMe <sub>2</sub> SiH | 65.9                  |

<sup>a</sup>Reaction conditions: 12  $\mu$ L (0.1 mmol) hexafluorobenzene and different kinds of silanes (2 mmol) were added to 0.4 mL methanol solution of (TSPP)Rh<sup>III</sup> (2.5mM) and sodium borate (0.012M), stirring at 60 °C under light irradiation (500 W Hg lamp, 15 cm distance) for 36 hours. <sup>b</sup>GC results, <sup>c</sup> hexafluorobenzene 24 $\mu$ L (0.2 mmol) was used.

## 5. General Procedure for Catalytic Hydrodefluorination Catalyzed by Porphyrin Rhodium

In a 25 mL Schlenk flask sealed with a Teflon cap, 1.0 mmol perfluoroarenes and 270  $\mu$ L (2.0 mmol) Me<sub>2</sub>EtSiH were added to 0.50 mL methanol solution of (TSPP)Rh<sup>III</sup> (2mM) and sodium borate (0.012M), then 0.5 mL ethylene glycol were added. After being degassed by three freeze-pump-thaw cycles, the mixture was stirred at 60 °C under light irradiation for 36 hours. (500 W Hg lamp, 15 cm distance). In addition, the catalytic hydrodefluorination of pentafluorotoluene and N,N-dimethylpentafluoroaniline didn't occur under our standard reaction condition, indicating that our system showed no hydrodefluorination activity for pentafluorotoluene and N,N-dimethylpentafluoroaniline.

## 6. Spectral Data for Selected Compounds

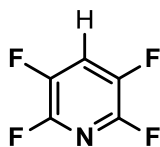

2,3,5,6-Tetrafluoropyridine  $^{19}\text{F}$  NMR (282 MHz)  $\delta$  (ppm) -30.18 (m, 2F), -78.06 (m, 2F).

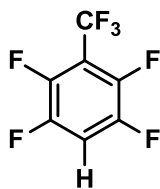

2,3,5,6-Tetrafluorobenzotrifluoride.  $^{19}\text{F}$  NMR (282 MHz)  $\delta$  (ppm) 5.90(m, 3F), -74.1 (m, 2F), -78.0 (m, 2F).

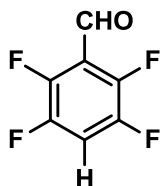

2,3,5,6-Tetrafluorobenzaldehyde.  $^{19}\text{F}$  NMR (282 MHz)  $\delta$  (ppm) -73.5 (m, 2F), -81.3 (m, 2F).

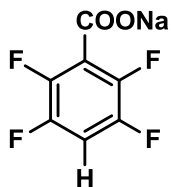

Sodium 2,3,5,6-tetrafluorobenzoate.  $^{19}\text{F}$  NMR (282 MHz).  $\delta$  (ppm) -77.4 (m,2F), -81.8 (m, 2F).

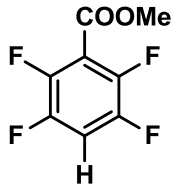

Methyl 2,3,5,6-Tetrafluorobenzoate.  $^{19}\text{F}$  NMR (282 MHz).  $\delta$  (ppm) -75.8 (m, 2F), -78.3 (m, 2F).

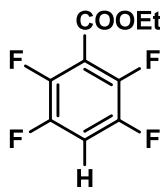

Ethyl 2,3,5,6-tetrafluorobenzoate.  $^{19}\text{F}$  NMR (282 MHz).  $\delta$  (ppm) -75.8(m,2F), -78.6 (m, 2F).

## Reference

- (1) K. R. Ashley, S. B. Shyu and J. G. Leipoldt, *Inorg. Chem.*, 1980, **19**, 1613.
- (2) X. Fu and B. B. Wayland, *J. Am. Chem. Soc.*, 2004, **126**, 2623.
- (3) Z. Ling, L. Yun, L. Liu, B. Wu and X. Fu, *Chem. Commun.*, 2013, **49**, 4214.
